6. Levy JH, Douketis J, Steiner T, Goldstein JN, Milling TJ: Prothrombin complex concentrates for perioperative vitamin K antagonist and non-vitamin K anticoagulant reversal. *ANESTHESIOLOGY* 2018; 129:1171–84
7. Spahn DR, Bouillon B, Cerny V, Duranteau J, Filipescu D, Hunt BJ, Komadina R, Maegele M, Nardi G, Riddez L, Samama C, Vincent J, Rossaint R: The European guideline on management of major bleeding and coagulopathy following trauma: Fifth edition. *Crit Care* 2019;23(1):98
8. Levy JH, Grottke O, Fries D, Kozek-Langenecker S: Therapeutic plasma transfusion in bleeding patients: A systematic review. *Anesth Analg* 2017; 124:1268–76
9. Levy JH, Sniecinski RM, Welsby IJ, Levi M: Antithrombin: Anti-inflammatory properties and clinical applications. *Thromb Haemost* 2016; 115:712–28

## ANESTHESIOLOGY REFLECTIONS FROM THE WOOD LIBRARY-MUSEUM

# Anesthetic Inductions from Hexobarbital to Pentothal: Counting Down from 6 to 5?

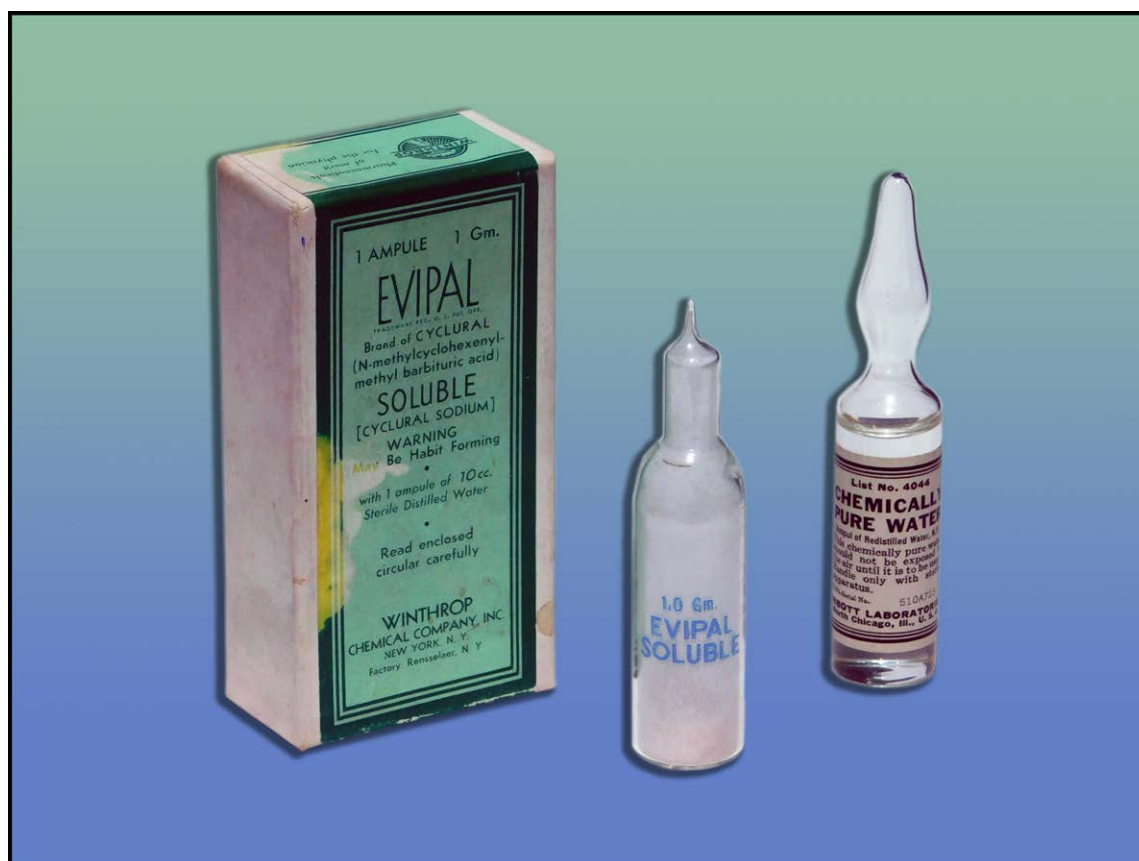

The search for ultra-short-acting intravenous induction agents focused initially on hexobarbital. That methylated oxybarbiturate was discovered in 1932 by German researchers H. Weese and W. Scharpf. Marketed by the Bayer Company in Europe as Evipan, hexobarbital was distributed by New York's Winthrop Chemical Company as "Evipal Soluble" (above). Hexobarbital has a six-carbon side-ring of cyclohexene. Contrast that with the thiobarbiturate that supplanted hexobarbital: sodium thiopental (branded Pentothal by Abbott Laboratories, USA), which has a five-carbon side chain of pentane. (Copyright © the American Society of Anesthesiologists' Wood Library-Museum of Anesthesiology.)

*George S. Bause, M.D., M.P.H., Honorary Curator and Laureate of the History of Anesthesia, Wood Library-Museum of Anesthesiology, Schaumburg, Illinois, and Clinical Associate Professor, Case Western Reserve University, Cleveland, Ohio. UJYC@aol.com.*
